# Supplementary material
Source: Springer Nature journal article supplement (https://www.springermedizin.de/resource/supplementary/13054_2011_9573_MOESM1_ESM.pdf/9706508)
Supplement: MOESM1 [file 9706508]

**Assessed for  
eligibility: 100**

**Excluded 20:**  
**-Did not meet inclusion criteria:  
18**  
**- Refused consent: 2**

**Randomized: 80**

**Allocated to fenoldopam: 40**  
**Received allocated  
intervention: 40**

**None lost to follow up**  
**No discontinued  
intervention**

**Analyzed 40**  
**None excluded from the  
analysis**

**Allocated to placebo: 40**  
**Received allocated  
intervention: 40**

**None lost to follow up**  
**1 discontinued intervention  
(infusion stopped by the  
anaesthesiologist)**

**Analyzed 40**  
**None excluded from  
the analysis**
